# Supplementary material
Source: PubMed Central journal article supplement (PMC5114635)
Supplement: JCSM-7-587-s002.pdf [file JCSM-7-587-s002.pdf]

Online resource 2. *Effect of the DHA-enriched diet on muscle fatty acid composition*

|              | CTL diet                    |                             | DHA diet                    |                              | ANOVA       |
|--------------|-----------------------------|-----------------------------|-----------------------------|------------------------------|-------------|
|              | Fed                         | Starved                     | Fed                         | Starved                      |             |
| C14:0        | 1.055 ± 0.090 <sup>a</sup>  | 0.730 ± 0.060 <sup>b</sup>  | 1.358 ± 0.027 <sup>c</sup>  | 1.045 ± 0.103 <sup>a</sup>   | D, S        |
| C15:0        | < LD                        | 0.250 ± 0.049               | < LD                        | 0.530 ± 0.230                | -           |
| C16:0        | 25.982 ± 4.811 <sup>a</sup> | 20.710 ± 1.848 <sup>a</sup> | 20.778 ± 0.796 <sup>a</sup> | 30.164 ± 5.50 <sup>a</sup>   | -           |
| C16:1 n-9    | 0.838 ± 0.073 <sup>a</sup>  | 1.080 ± 0.118 <sup>b</sup>  | 0.838 ± 0.025 <sup>a</sup>  | 0.970 ± 0.075 <sup>ab</sup>  | S           |
| C16:1 n-7    | 3.814 ± 0.353 <sup>ab</sup> | 1.822 ± 0.156 <sup>c</sup>  | 4.776 ± 0.450 <sup>a</sup>  | 2.765 ± 0.656 <sup>bc</sup>  | S, D        |
| C18:0        | 6.470 ± 1.631 <sup>ab</sup> | 11.352 ± 1.875 <sup>a</sup> | 4.000 ± 0.447 <sup>b</sup>  | 11.620 ± 3.551 <sup>a</sup>  | S           |
| C18:1 9cis   | 44.618 ± 4.558 <sup>a</sup> | 26.108 ± 5.994 <sup>b</sup> | 44.668 ± 1.000 <sup>a</sup> | 32.164 ± 0.825 <sup>ab</sup> | S           |
| C18:1 n-7    | 2.290 ± 0.178 <sup>a</sup>  | 3.172 ± 0.205 <sup>b</sup>  | 1.312 ± 0.052 <sup>c</sup>  | 1.390 ± 0.147 <sup>c</sup>   | S, D, S x D |
| C18:2 n-6cis | 10.010 ± 0.790 <sup>a</sup> | 11.268 ± 0.463 <sup>a</sup> | 11.592 ± 0.519 <sup>a</sup> | 9.530 ± 1.681 <sup>a</sup>   | -           |
| C20:0        | 0.183 ± 0.059 <sup>ab</sup> | 0.173 ± 0.012 <sup>ab</sup> | 0.090 ± 0.004 <sup>b</sup>  | 0.256 ± 0.064 <sup>a</sup>   | -           |
| C20:1 n-9    | 0.584 ± 0.074 <sup>a</sup>  | 0.614 ± 0.156 <sup>a</sup>  | 0.510 ± 0.019 <sup>a</sup>  | 0.556 ± 0.080 <sup>a</sup>   | -           |
| C18:3 n-3    | < LD                        | < LD                        | 0.133 ± 0.014               | < LD                         | -           |
| C20:3 n-6    | 0.324 ± 0.024 <sup>a</sup>  | 0.946 ± 0.147 <sup>b</sup>  | 0.066 ± 0.002 <sup>c</sup>  | 0.107 ± 0.012 <sup>ac</sup>  | S, D, S x D |
| C20:4 n-6    | 2.698 ± 0.293 <sup>a</sup>  | 10.242 ± 1.631 <sup>b</sup> | 0.476 ± 0.035 <sup>a</sup>  | 0.642 ± 0.094 <sup>a</sup>   | S, D, S x D |
| C20:5 n-3    | < LD                        | < LD                        | 0.168 ± 0.007 <sup>b</sup>  | 0.113 ± 0.017 <sup>c</sup>   | -           |
| C22:5 n-6    | 0.824 ± 0.061 <sup>a</sup>  | 4.062 ± 0.789 <sup>b</sup>  | 0.396 ± 0.024 <sup>a</sup>  | 0.454 ± 0.053 <sup>b</sup>   | S, D, S x D |
| C22:5 n-3    | 0.070 ± 0.010 <sup>a</sup>  | 0.322 ± 0.080 <sup>b</sup>  | 0.322 ± 0.019 <sup>b</sup>  | 0.340 ± 0.029 <sup>b</sup>   | -           |
| C22:6 n-3    | 1.190 ± 0.072 <sup>a</sup>  | 7.020 ± 1.510 <sup>b</sup>  | 8.398 ± 0.752 <sup>b</sup>  | 9.230 ± 1.144 <sup>b</sup>   | S, D, S x D |

Data (in % of total fatty acids) are means ± SEM for n = 6 mice. Statistical differences were assessed by ANOVA. D, diet effect; S, starvation effect. S x D, interaction between diet and starvation effect. Values within a row with different superscript letters are significantly different. < LD, stands for below limit of detection

**DHA-supplementation prior to fasting prevents muscle atrophy of starved mice**

Christiane Deval<sup>\*,!</sup>, Frédéric Capel<sup>\*,!</sup>, Brigitte Laillet<sup>\*,!</sup>, Cécile Polge<sup>\*,!</sup>, Daniel Béchet<sup>\*,!</sup>, Daniel Taillandier<sup>\*,!</sup>, Didier Attaix<sup>\*,!</sup>, Lydie Combaret<sup>\*,!</sup>

\* Clermont Université, Université d’Auvergne, Unité de Nutrition Humaine, 58 rue Montalembert, 63000 Clermont-Ferrand, France, and <sup>!</sup>INRA, UMR 1019, UNH, CRNH Auvergne, 63122 Saint Genes Champanelle, France

**Correspondence should be addressed to:**

Lydie Combaret, Ph.D., Email: [lydie.combaret@clermont.inra.fr](mailto:lydie.combaret@clermont.inra.fr), Tel: +33(4)73624824, Fax: +33(4)73624755
