# Supplementary material
Source: PubMed Central journal article supplement (PMC5114635)
Supplement: JCSM-7-587-s003.pdf [file JCSM-7-587-s003.pdf]

## Online resource 3

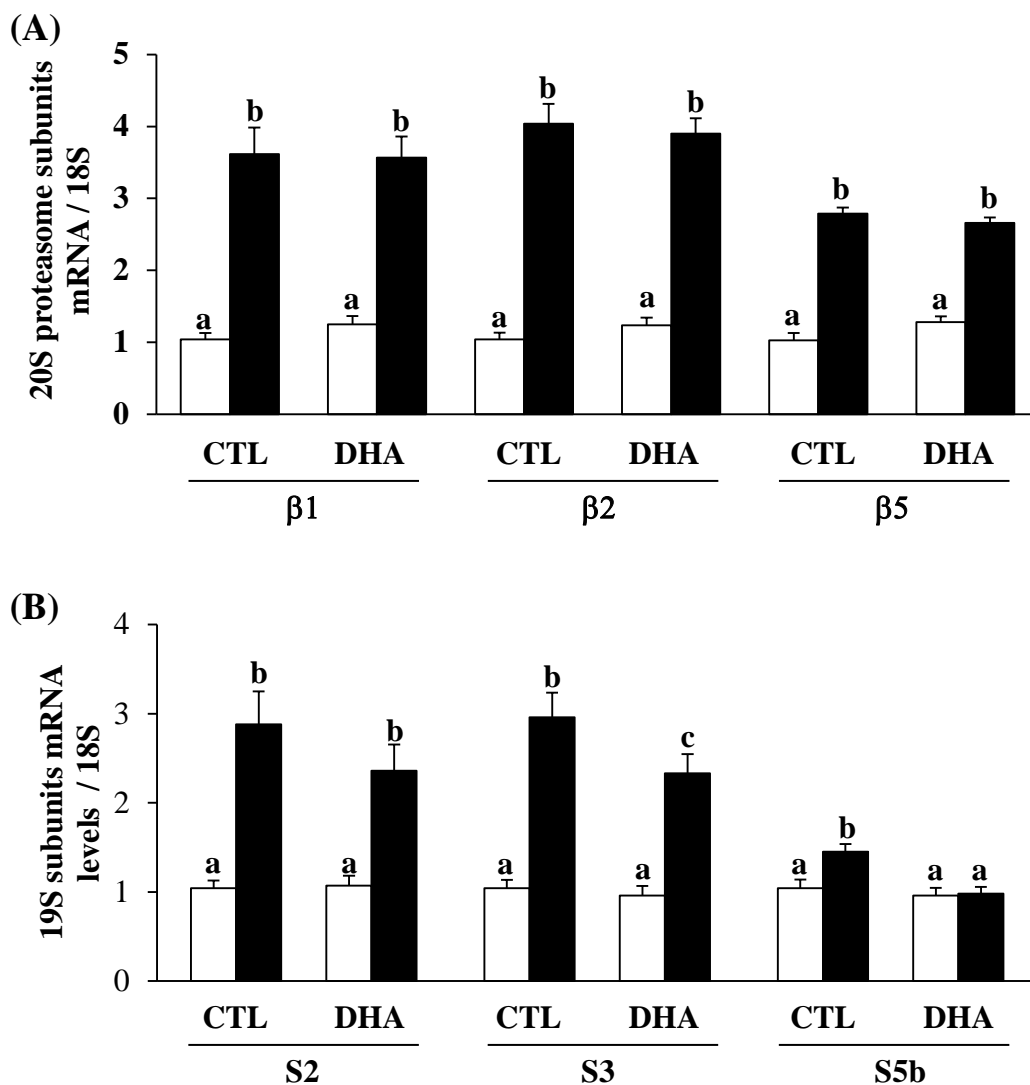

**Online resource 3.** Feeding the mice with the DHA-enriched diet prior to starvation had no effect on the expression of 20S (A) and 26S (B) proteasome subunits, but S5b in the starved TA. mRNA levels were determined by RT-qPCR in the TA from CTL or DHA groups and normalized against 18S. Data are expressed as fold induction vs. CTL fed mice and are means  $\pm$  SEM (n = 5-6 mice/group). Statistical differences were assessed by ANOVA. Bars with different superscript letters are statistically different.

### DHA-supplementation prior to fasting prevents muscle atrophy of starved mice

Christiane Deval<sup>\*,1</sup>, Frédéric Capel<sup>\*,1</sup>, Brigitte Laillet<sup>\*,1</sup>, Cécile Polge<sup>\*,1</sup>, Daniel Béchet<sup>\*,1</sup>, Daniel Taillandier<sup>\*,1</sup>, Didier Attaix<sup>\*,1</sup>, Lydie Combaret<sup>\*,1</sup>

<sup>\*</sup>Clermont Université, Université d'Auvergne, Unité de Nutrition Humaine, 58 rue Montalembert, 63000 Clermont-Ferrand, France, and <sup>1</sup>INRA, UMR 1019, UNH, CRNH Auvergne, 63122 Saint Genes Champanelle, France

### Correspondence should be addressed to:

Lydie Combaret, Ph.D., Email: [lydie.combaret@clermont.inra.fr](mailto:lydie.combaret@clermont.inra.fr), Tel: +33(4)73624824, Fax: +33(4)73624755
